# Supplementary material for: Stronger neural response to canonical finger‐number configurations in deaf compared to hearing adults revealed by FPVS‐EEG
Source: PubMed Central journal article supplement (PMC10203804; doi:10.1002/hbm.26297), 2023-04-06
Supplement: HBM-44-3555-s001.pdf [file HBM-44-3555-s001.pdf]

**Supplementary Material: Stronger neural response to canonical finger-number configurations in deaf compared to hearing adults revealed by FPVS-EEG**

Supplementary Table 1. *Detailed Characteristics of Deaf Participants*

| Subject | Deafness level                         | Hearing aids                             | Hearing aids use since                 | Sign language knowledge | French/Dutch level | Sign language use frequency | Mother tongue       | Sign language learned at |
|---------|----------------------------------------|------------------------------------------|----------------------------------------|-------------------------|--------------------|-----------------------------|---------------------|--------------------------|
| 1       | profound                               | yes                                      | 2 y/o                                  | yes                     | good               | daily                       | French              | 16 y/o                   |
| 2       | profound                               | yes                                      | 6 y/o                                  | yes                     | good               | daily                       | Dutch               | 7 y/o                    |
| 3       | severe                                 | yes                                      | 7 y/o                                  | yes                     | excellent          | daily                       | French              | 5 y/o                    |
| 4       | profound                               | no                                       | /                                      | yes                     | fairly good        | daily                       | VGT                 | Mother tongue            |
| 5       | profound                               | CI                                       | 2005                                   | yes                     | excellent          | daily                       | French              | 20 y/o                   |
| 6       | Profound and severe                    | CI                                       | 16 y/o                                 | yes                     | good               | daily                       | French              | 19 y/o                   |
| 7       | profound                               | used to have it, not anymore             | 5 y/o right ear                        | yes                     | bad                | daily                       | VGT                 | Native                   |
| 8       | profound                               | yes                                      | 1 y/o but stopped wearing it at 16 y/o | yes                     | normal             | always                      | LSFB                | Native                   |
| 9       | profound                               | Yes, left ear                            | 5 y/o                                  | yes                     | good               | daily                       | VGT                 | Mother tongue            |
| 10      | profound                               | CI, right ear                            | 2,5 y/o                                | yes                     | good               | daily                       | VGT                 | Mother tongue            |
| 11      | profound                               | Yes, but does not use it often; left ear | /                                      | yes                     | moderate           | always                      | VGT                 | Native                   |
| 12      | Profound right ear and severe left ear | yes                                      | 8 months                               | yes                     | good               | daily                       | French              | 14 y/o                   |
| 13      | profound                               | CI                                       | 2 y/o                                  | yes                     | bon                | daily                       | French              | 2 y/o                    |
| 14      | profound                               | no                                       | /                                      | yes                     | does not speak     | always                      | VGT                 | Native                   |
| 15      | profound                               | no                                       | /                                      | yes                     | moderate           | always                      | VGT                 | Native                   |
| 16      | profound                               | yes, left ear                            | 3 y/o                                  | yes                     | good               | daily                       | VGT                 | Mother tongue            |
| 17      | profound                               | no                                       | /                                      | yes                     | bad                | daily                       | Dutch with gestures | 51 y/o                   |
| 18      | profound                               | yes, left ear                            | since primary school                   | yes                     | weak               | daily                       | VGT                 | Native                   |
| 19      | Profound and severe                    | yes, right ear                           | 11 months                              | yes                     | bon                | daily                       | LSFB                | Native                   |
| 20      | profound                               | CI                                       | left ear 2,5 y/o; 13 y/o right ear     | yes                     | N/A                | daily                       | French              | 2 y/o                    |
| 21      | profound                               | CI right, but does                       | 2 y/o                                  | yes                     | good               | daily                       | LSFB                | Mother tongue            |

---

not use it  
often

---

### Benjamini-Hochberg corrections

To also check false discovery rate errors, Benjamini-Hochberg corrections were moreover performed on the uncorrected p-values obtained in every last statistical model of our analyses. Please note that these corrections result in similar conclusions as reported in the manuscript (using Bonferroni corrections).

#### *Base Rate Responses Finger-montring*

| Rank (k)        | Sorted p-values | $P(k) \times (m/k)$        | BH adjusted p-values | Reject H0? |
|-----------------|-----------------|----------------------------|----------------------|------------|
| 1: intercept    | .001            | $.001 \times (4/1) = .004$ | .004                 | Yes        |
| 2: hemisphere   | .005            | $.005 \times (4/2) = .010$ | .010                 | Yes        |
| 3: group x hemi | .032            | $.032 \times (4/3) = .043$ | .043                 | Yes        |
| 4: Group        | .356            | $.356 \times (4/4) = .356$ | .356                 | No         |

#### *Categorical Discrimination Responses Finger-montring*

| Rank (k)      | Sorted p-values | $P(k) \times (m/k)$        | BH adjusted p-values | Reject H0? |
|---------------|-----------------|----------------------------|----------------------|------------|
| 1: intercept  | .007            | $.007 \times (4/1) = .028$ | .028                 | Yes        |
| 2: group      | .010            | $.010 \times (4/2) = .020$ | .020                 | Yes        |
| 3: covariate  | .050            | $.050 \times (4/3) = .067$ | .067                 | No         |
| 4: hemisphere | .726            | $.726 \times (4/4) = .726$ | .726                 | No         |

#### *Base Rate Responses Finger-counting*

| Rank (k)              | Sorted p-values | $P(k) \times (m/k)$        | BH adjusted p-values | Reject H0? |
|-----------------------|-----------------|----------------------------|----------------------|------------|
| 1: intercept          | .001            | $.001 \times (4/1) = .004$ | .004                 | Yes        |
| 2: hemisphere         | .002            | $.002 \times (4/2) = .004$ | .004                 | Yes        |
| 3: group x hemisphere | .083            | $.083 \times (4/3) = .111$ | .111                 | No         |
| 4: group              | .227            | $.227 \times (4/4) = .227$ | .227                 | No         |

#### *Categorical Discrimination Responses Finger-counting*

| Rank (k)      | Sorted p-values | $P(k) \times (m/k)$        | BH adjusted p-values | Reject H0? |
|---------------|-----------------|----------------------------|----------------------|------------|
| 1: covariate  | .000            | $.000 \times (4/1) = .000$ | .000                 | Yes        |
| 2: group      | .239            | $.239 \times (4/2) = .478$ | .478                 | No         |
| 3: intercept  | .366            | $.366 \times (4/3) = .488$ | .488                 | No         |
| 4: hemisphere | .817            | $.817 \times (4/4) = .817$ | .817                 | No         |
